# Supplementary material for: Linear instability analysis of a shear thinning gelled jet with yield stress in coaxial atomization
Source: Royal Society of Chemistry journal article supplement (doi:10.1039/d3sm00583f), 2023-01-01
Supplement: d3sm00583f5.pdf [file d3sm00583f5.pdf]

## Supporting Material

To preserve the nonlinear characteristics of the Herschel-Bulkley fluids while ensuring the solvability of governing equations, a coefficient  $g$  which indicates the variation of velocity with the distance along  $z$ -axis and is related to the properties of fluid is introduced into the linearization of the liquid momentum equations. Then yields that

$$\tau_{zz} = \tau_{yz} + K \left( 2 \frac{\partial u_{lz}}{\partial z} \right)^n = \tau_{yz} + K \left( 2g + 2 \frac{\partial u_{lz}}{\partial z} \right)^n. \quad (1)$$

Using binomial theorem expansion and omitting high-order small quantities, we get

$$\tau_{zz} \approx \tau_{yz} + K \left[ (2g)^n + 2n(2g)^{n-1} \frac{\partial u_{lz}}{\partial z} \right]. \quad (2)$$

We assume that velocities, pressures, and stresses are equal to the initial steady state, plus the unsteady disturbances. It is assumed that the initial disturbances are only dependent on the radial position  $r$  as well.

$$\mathbf{u}_l = (0, 0, u_l) + \mathbf{u}'_l = (0, 0, u_l) + \mathbf{u}'_{l0} \exp(-i\omega t + im\theta + ikz), \quad (3)$$

where  $\mathbf{u}'_{l0} = (u'_{l0r}, u'_{l0\theta}, u'_{l0z})$ .

$$\mathbf{u}_g = \left( 0, \frac{W_0}{r}, u_g \right) + \mathbf{u}'_g = \left( 0, \frac{W_0}{r}, u_g \right) + \mathbf{u}'_{g0} \exp(-i\omega t + im\theta + ikz), \quad (4)$$

where  $\mathbf{u}'_{g0} = (u'_{g0r}, u'_{g0\theta}, u'_{g0z})$ .

$$P_l = p_l + p'_l = p_l + p'_{l0} \exp(-i\omega t + im\theta + ikz), \quad (5)$$

$$P_g = p_g + p'_g = p_g + p'_{g0} \exp(-i\omega t + im\theta + ikz), \quad (6)$$

Then we linearize the governing equations using the disturbances on the basis of preserving the nonlinear characteristics of the Herschel-Bulkley fluid. Substitute Eqs.

(2), (3) and (5) into the liquid governing equations then gives

$$\frac{du'_{l0r}}{dr} + \frac{u'_{l0r}}{r} + \frac{im}{r} u'_{l0\theta} + iku'_{l0z} = 0, \quad (7)$$

$$\rho_l (-i\omega + iku_l) u'_{l0r} = -\frac{dp'_{l0}}{dr}, \quad (8)$$

$$\rho_l (-i\omega + iku_l) u'_{l0\theta} = -im \frac{p'_{l0}}{r}, \quad (9)$$

$$\rho_l (-i\omega + iku_l) u'_{l0z} = -ikp'_{l0} - 2nK(2g)^{n-1} k^2 u'_{l0z}. \quad (10)$$

In the same way, substitute Eqs. (4) and (6) into the gas governing equations then the

linearized forms are expressed as:

$$\frac{du'_{g0r}}{dr} + \frac{u'_{g0r}}{r} + \frac{im}{r} u'_{g0\theta} + iku'_{g0z} = 0, \quad (11)$$

$$\rho_g \left[ \left( -i\omega + im \frac{W_0}{r^2} + iku_g \right) u'_{g0r} - \frac{2W_0 u'_{g0\theta}}{r^2} \right] = -\frac{dp'_{g0}}{dr}, \quad (12)$$

$$\rho_g \left[ \left( -i\omega + im \frac{W_0}{r^2} + iku_g \right) u'_{g0r} \right] = -\frac{dp'_{g0}}{dr}, \quad (13)$$

$$\rho_g \left( -i\omega + im \frac{W_0}{r^2} + iku_g \right) u'_{g0z} = -ikp'_{g0}. \quad (14)$$

Based on the general solution forms of Bessel equation and Eqs. (8)—(10), the special

solutions of initial disturbed pressure and velocities in the gel phase are yielded as:

$$p'_{l0} = a \rho_l u_l (-i\omega + iku_l) A_1 I_m(lr), \quad (15)$$

$$u'_{l0r} = -a u_l l A_1 I'_m(lr), \quad (16)$$

$$u'_{l0\theta} = -a u_l \frac{im}{r} A_1 I_m(lr), \quad (17)$$

$$u'_{l0z} = \frac{a u_l \rho_l (-i\omega + iku_l) ik}{\rho_l (-i\omega + iku_l) + 2nK(2g)^{n-1} k^2} A_1 I_m(kr), \quad (18)$$

where  $I_m$  is the  $m$ th-order modified Bessel function of the first kind,  $l$  and  $A_1$  are

respectively expressed as:

$$l = k \sqrt{\frac{\rho_l g (-i\omega + iku_l)}{\rho_l g (-i\omega + iku_l) + Knk^2 (2g)^n}}. \quad (19)$$

$$A_1 = -\frac{\varepsilon_0(-i\omega + iku_l)}{au_l I'_m(lr)}. \quad (20)$$

Similarly, the special solutions of initial disturbed pressure and velocities in the gas phase are as follows:

$$p'_{g0} = A_2 K_m(kr), \quad (21)$$

$$u'_{g0r} = -\frac{2imQ_2 A_2 K_m(kr) + krQ_1 A_2 K'_m(kr)}{r\rho_g Q_1^2}, \quad (22)$$

$$u'_{g0\theta} = \frac{-imA_2 K_m(kr)}{r\rho_g Q_1}, \quad (23)$$

$$u'_{g0z} = -\frac{ikA_2 K_m(kr)}{\rho_g Q_1}, \quad (24)$$

where  $K_m$  is the  $m$ th-order modified Bessel function of the second kind,  $Q_1$ ,  $Q_2$  and  $A_2$  are expressed as:

$$Q_1 = -i\omega + im\frac{W_0}{r^2} + iku_g, \quad (25)$$

$$Q_2 = \frac{W_0}{r^2}, \quad (26)$$

$$A_2 = -\frac{r\varepsilon_0\rho_g Q_1^2 \left( -i\omega + im\frac{W_0}{r} + iku_g \right)}{2imQ_2 K_m(kr) + krQ_1 K'_m(kr)}. \quad (27)$$

The manipulation to obtain the dispersion relation of a reducing form is as follows.

$$\begin{aligned}
P_l &= p_l + p'_{l0} \exp(-i\omega t + im\theta + ikz) \\
&= p_l + a\rho_l u_l(-i\omega + iku_l) A_1 I_m(lr) \exp(-i\omega t + im\theta + ikz) \\
&= p_l + \frac{a\rho_l u_l(-i\omega + iku_l)(-\varepsilon_0(-i\omega + iku_l)) I_m(lr)}{au_l I'_m(lr)} , \\
&= p_l + \frac{-\rho_l(-i\omega + iku_l)^2}{l} \frac{I_m(lr)}{I'_m(lr)} \varepsilon
\end{aligned} \tag{28}$$

and

$$\begin{aligned}
P_g &= p_g + p'_{g0} \exp(-i\omega t + im\theta + ikz) \\
&= p_g + A_2 K_m(kr) \exp(-i\omega t + im\theta + ikz) , \\
&= p_g - r\rho_g Q_1^2(-i\omega + im\frac{W_0}{r} + iku_g) \frac{K_m(kr)}{2imQ_2 K_m(kr) + krQ_1 K'_m(kr)} \varepsilon
\end{aligned} \tag{29}$$

thus

$$\begin{aligned}
P_l - P_g &= p_l - p_g - \frac{\rho_l(-i\omega + iku_l)^2}{l} \frac{I_m(lr)}{I'_m(lr)} \varepsilon \\
&\quad + r\rho_g Q_1^2(-i\omega + im\frac{W_0}{r} + iku_g) \frac{K_m(kr)}{2imQ_2 K_m(kr) + krQ_1 K'_m(kr)} \varepsilon .
\end{aligned} \tag{30}$$

Because

$$\frac{\partial^2 \varepsilon}{\partial \theta^2} = -m^2 \varepsilon, \quad \frac{\partial^2 \varepsilon}{\partial z^2} = -k^2 \varepsilon, \tag{31}$$

$$\rho_g \frac{W_0^2}{a^3} R = \rho_g \frac{W_0^2}{a^3} (a + \varepsilon) = \rho_g \frac{W_0^2}{a^2} + \rho_g \frac{W_0^2}{a^3} \varepsilon, \tag{32}$$

$$\begin{aligned}
\frac{du_l}{dr} &= \frac{du'_{l0r}}{dr} \exp(-i\omega t + im\theta + ikz) \\
&= -au_l l^2 A_1 I''_m(lr) \exp(-i\omega t + im\theta + ikz), \\
&= l(-i\omega + iku_l) \frac{I''_m(lr)}{I'_m(lr)} \varepsilon
\end{aligned} \tag{33}$$

so

$$\begin{aligned}
&-\sigma \left( \frac{1}{a^2} + \frac{1}{a^2} \frac{\partial^2}{\partial \theta^2} + \frac{\partial^2}{\partial z^2} \right) \varepsilon + \rho_g \frac{W_0^2}{a^3} R + 2\mu_l \frac{du_l}{dr} \\
&= -\sigma \left( \frac{1}{a^2} - \frac{m^2}{a^2} - k^2 \right) \varepsilon + \rho_g \frac{W_0^2}{a^3} \varepsilon + \rho_g \frac{W_0^2}{a^2} + 2\mu_l l(-i\omega + iku_l) \frac{I''_m(lr)}{I'_m(lr)} \varepsilon ,
\end{aligned} \tag{34}$$

Substitute the above into the pressure equilibrium equation in the dynamic boundary conditions, yielding that

$$\begin{aligned} & \left( -\frac{\rho_l(-i\omega + iku_l)^2}{l} \frac{I_m(lr)}{I'_m(lr)} + r\rho_g Q_1^2 \left( -i\omega + im\frac{W_0}{r} + iku_g \right) \frac{K_m(kr)}{2imQ_2 K_m(kr) + krQ_1 K'_m(kr)} \right. \\ & \left. - 2\mu_l l(-i\omega + iku_l) \frac{I''_m(lr)}{I'_m(lr)} \right) \varepsilon = \left( -\sigma \left( \frac{1}{a^2} - \frac{m^2}{a^2} - k^2 \right) + \rho_g \frac{W_0^2}{a^3} \right) \varepsilon + \rho_g \frac{W_0^2}{a^2} + p_g - p_l \end{aligned} \quad (35)$$

The dispersion equation is obtained by dividing both sides of the equation by  $\varepsilon$  and omitting the nonlinear terms:

$$\begin{aligned} & -\frac{\rho_l(-i\omega + iku_l)^2}{l} \frac{I_m(lr)}{I'_m(lr)} + r\rho_g Q_1^2 \left( -i\omega + im\frac{W_0}{r} + iku_g \right) \frac{K_m(kr)}{2imQ_2 K_m(kr) + krQ_1 K'_m(kr)} \\ & - 2\mu_l l(-i\omega + iku_l) \frac{I''_m(lr)}{I'_m(lr)} = -\sigma \left( \frac{1}{a^2} - \frac{m^2}{a^2} - k^2 \right) + \rho_g \frac{W_0^2}{a^3} \end{aligned} \quad (36)$$
